# Supplementary material for: Cost and Impact on Patient Length of Stay of Rapid Molecular Testing for Clostridium difficile
Source: Springer Nature journal article supplement (doi:10.1007/s40121-014-0034-x), 2014-09-02
Supplement: MOESM2 [file 9339636]

- The aim of this study was to assess the cost of *Clostridium difficile* polymerase chain reaction (PCR) and its impact on length of hospital stay (LOS) for patients with suspicion of *C. difficile* infection (CDI) in an acute hospital setting compared to cell culture cytotoxin neutralization assay (CCNA) as the conventional diagnostic reference method.
- Cost comparison was undertaken by comparing the effect of stool testing using Xpert® *C. difficile* PCR (Cepheid, Sunnyvale, CA, USA), compared to routine CCNA, on LOS and cost of laboratory testing.
- PCR-positive patients ( $n = 121$ ) were discharged 4.88 days (95% CI -19.39-9.62;  $P = 0.822$ ) earlier than CCNA-positive patients ( $n = 115$ ) while PCR-negative patients ( $n = 146$ ) were discharged a mean 7.03 days (95% CI -20.66-6.60;  $P = 0.545$ ) earlier than CCNA-negative patients ( $n = 124$ ).
- Based on micro-costing, testing cost per sample was £36.18 for PCR, £7.53 for CCNA-positive, and £8.78 for CCNA-negative samples and potential cost savings of up to £2,292.62 per patient could be achieved by using PCR instead of CCNA.
- Despite the lack of statistical significance in the LOS differences, based on the 95% CI between PCR and CCNA tested patients and changes to other key parameters, PCR testing resulted in cost savings for the health care service in most calculated scenarios.

This summary slide represents the opinions of the authors. The project was supported by a non-promotional grant for educational purposes from Cepheid Inc., Sunnyvale, CA, USA and partially funded by Abertawe Bro Morgannwg University Health Board (ABMUHB), Swansea, UK. Cepheid Inc. has provided the funds to cover the publication charges for this article. For a full list of acknowledgments and conflicts of interest for all authors of this article, please see the full text online. Copyright © The Author(s) 2014. Creative Commons Attribution Noncommercial License (CC BY-NC).
